# Supplementary material for: The global dissemination of COVID-19 through two coexisting international transmission patterns
Source: Research Square preprint supplement (doi:10.21203/rs.3.rs-7395229/v1), 2025-10-14
Supplement: Supplementary file 1 [file 87b8e5254d8dba32255f5383.pdf]

# The global dissemination of COVID-19 through two coexisting international transmission patterns

## Supplementary Information

Hiroyasu Inoue

### 1 Supplementary figures

The following is the list of figures referred to in the main text.

SI Figure 1: Number of infected cases in all countries. In the main text, only the 20 most populous countries are shown for improved visibility.

SI Figure 2: Log ratio of infected cases in all countries. In the main text, only the 20 most populous countries are shown for improved visibility.

SI Figure 3: The legends for SI Figures 1 and 2.

SI Figure 4: Pair plots between auxiliary data points.

SI Figure 5: Scree plots for each year. In the main text, the scree plot for the entire period is shown.

SI Figure 6: The first eigenvectors for the entire period, 2020, 2021, and 2022. The plots are coloured by region.

SI Figure 7: Barycentres for each stringency index quintile group in the first eigenvectors.

SI Figure 8: Barycentres for each containment and health index quintile group in the first eigenvectors.

SI Figure 9: Barycentres for each vaccination rate quintile group in the first eigenvectors.

SI Figure 10: Barycentres of the second eigenvectors in the entire period.

SI Figure 12: Barycentres of the second eigenvectors in 2020.

SI Figure 13: Barycentres of the second eigenvectors in 2021.

SI Figure 14: Barycentres of the second eigenvectors in 2022.

SI Figure 11: Barycentres of the third eigenvectors in the entire period.

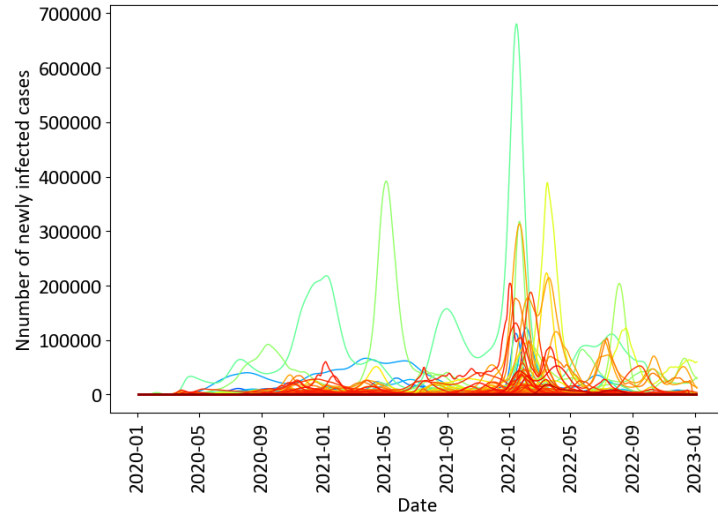

SI Figure 1: Number of infected cases in all countries. Each colour indicates a country. The correspondence of the colours with the countries is shown in SI Figure 3.

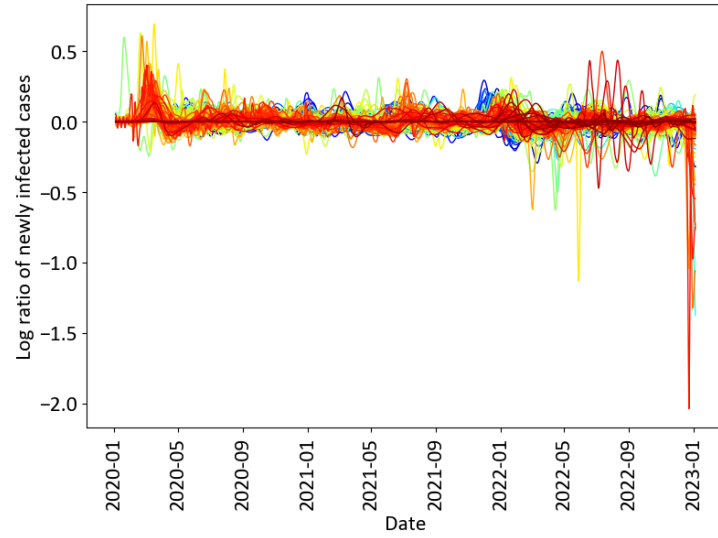

SI Figure 2: Log ratio of infected cases for all countries. Each colour indicates a country. The correspondence of the colours with the countries is shown in SI Figure 3.

| Country                          |                                  |                                  |                          |
|----------------------------------|----------------------------------|----------------------------------|--------------------------|
| Algeria                          | Argentina                        | Bhutan                           | Greece                   |
| Angola                           | Aruba                            | Brunei Darussalam                | Guernsey                 |
| Benin                            | Bahamas                          | Cambodia                         | Holy See                 |
| Burkina Faso                     | Barbados                         | China                            | Hungary                  |
| Burundi                          | Belize                           | Cyprus                           | Iceland                  |
| Cabo Verde                       | Bermuda                          | Georgia                          | Ireland                  |
| Cameroon                         | Bolivia                          | India                            | Isle of Man              |
| Central African Republic         | Bonaire                          | Indonesia                        | Italy                    |
| Chad                             | Brazil                           | Iran                             | Jersey                   |
| Comoros                          | British Virgin Islands           | Iraq                             | Latvia                   |
| Congo                            | Canada                           | Israel                           | Liechtenstein            |
| Côte d'Ivoire                    | Cayman Islands                   | Japan                            | Lithuania                |
| Democratic Republic of the Congo | Chile                            | Jordan                           | Luxembourg               |
| Djibouti                         | Colombia                         | Kazakhstan                       | Malta                    |
| Egypt                            | Costa Rica                       | Kuwait                           | Monaco                   |
| Equatorial Guinea                | Cuba                             | Kyrgyzstan                       | Montenegro               |
| Eritrea                          | Curaçao                          | Lao People's Democratic Republic | Netherlands              |
| Eswatini                         | Dominica                         | Lebanon                          | North Macedonia          |
| Ethiopia                         | Dominican Republic               | Malaysia                         | Norway                   |
| Gabon                            | Ecuador                          | Maldives                         | Poland                   |
| Gambia                           | El Salvador                      | Mongolia                         | Portugal                 |
| Ghana                            | Falkland Islands                 | Myanmar                          | Republic of Moldova      |
| Guinea                           | French Guiana                    | Nepal                            | Romania                  |
| Guinea Bissau                    | Greenland                        | Oman                             | Russian Federation       |
| Kenya                            | Grenada                          | Pakistan                         | San Marino               |
| Lesotho                          | Guadeloupe                       | Palestine                        | Serbia                   |
| Liberia                          | Guatemala                        | Philippines                      | Slovakia                 |
| Libya                            | Guyana                           | Qatar                            | Slovenia                 |
| Madagascar                       | Haiti                            | Republic of Korea                | Spain                    |
| Malawi                           | Honduras                         | Saudi Arabia                     | Sweden                   |
| Mali                             | Jamaica                          | Singapore                        | Switzerland              |
| Mauritania                       | Martinique                       | Sri Lanka                        | The United Kingdom       |
| Mauritius                        | Mexico                           | Syrian Arab Republic             | Ukraine                  |
| Mayotte                          | Montserrat                       | Tajikistan                       | American Samoa           |
| Morocco                          | Nicaragua                        | Thailand                         | Australia                |
| Mozambique                       | Panama                           | Timor Leste                      | Cook Islands             |
| Namibia                          | Paraguay                         | Turkey                           | Fiji                     |
| Niger                            | Peru                             | United Arab Emirates             | French Polynesia         |
| Nigeria                          | Puerto Rico                      | Uzbekistan                       | Guam                     |
| Rwanda                           | Saint Barthélemy                 | Viet Nam                         | Kiribati                 |
| Réunion                          | Saint Kitts and Nevis            | Yemen                            | Marshall Islands         |
| Saint Helena                     | Saint Lucia                      | Albania                          | Micronesia               |
| Sao Tome and Principe            | Saint Martin                     | Andorra                          | Nauru                    |
| Senegal                          | Saint Pierre and Miquelon        | Austria                          | New Caledonia            |
| Seychelles                       | Saint Vincent and the Grenadines | Belarus                          | New Zealand              |
| Sierra Leone                     | Sint Maarten                     | Belgium                          | Niue                     |
| Somalia                          | Suriname                         | Bosnia and Herzegovina           | Northern Mariana Islands |
| South Africa                     | Trinidad and Tobago              | Bulgaria                         | Palau                    |
| South Sudan                      | Turks and Caicos Islands         | Croatia                          | Papua New Guinea         |
| Sudan                            | United States Virgin Islands     | Czechia                          | Pitcairn Islands         |
| Togo                             | United States of America         | Denmark                          | Samoa                    |
| Tunisia                          | Uruguay                          | Estonia                          | Solomon Islands          |
| Uganda                           | Venezuela                        | Faroe Islands                    | Tokelau                  |
| United Republic of Tanzania      | Afghanistan                      | Finland                          | Tonga                    |
| Zambia                           | Armenia                          | France                           | Tuvalu                   |
| Zimbabwe                         | Azerbaijan                       | Germany                          | Vanuatu                  |
| Anguilla                         | Bahrain                          | Gibraltar                        | Wallis and Futuna        |
| Antigua and Barbuda              | Bangladesh                       |                                  |                          |

SI Figure 3: Correspondence of colours with countries. These colours are used in SI Figures 1 and 2.

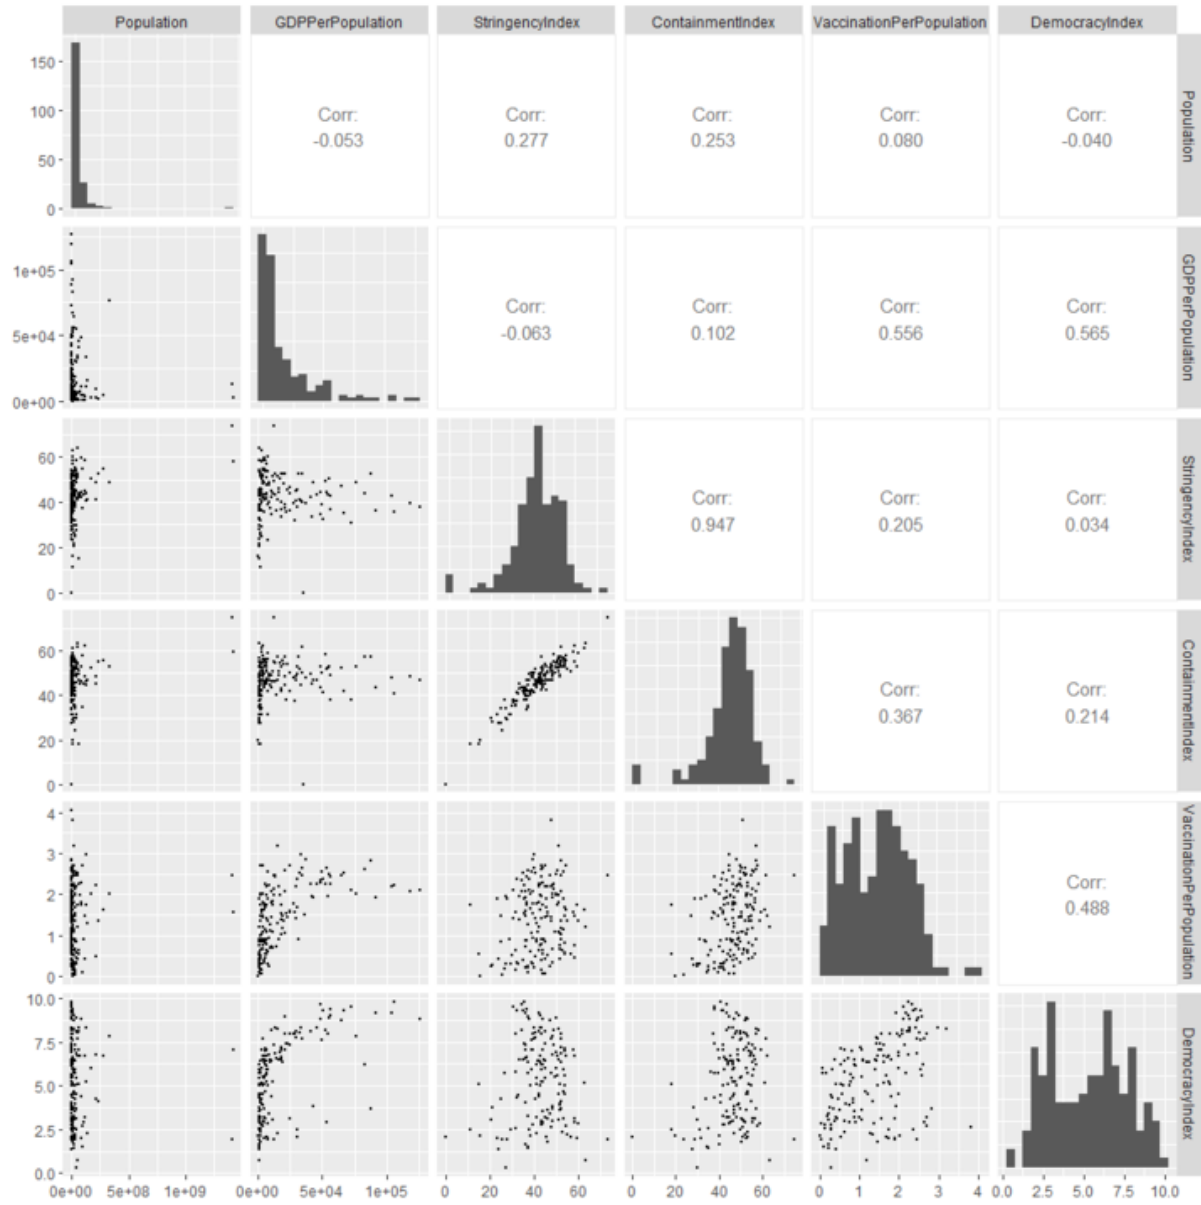

SI Figure 4: Pair plots between auxiliary data points.

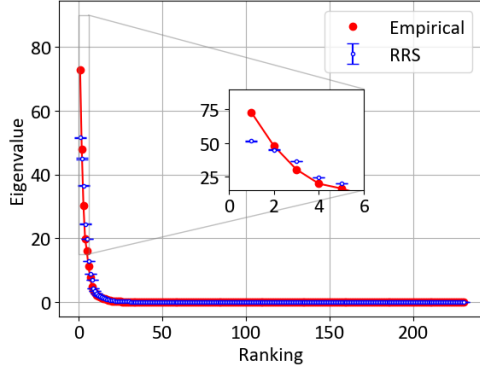

(a) 2020

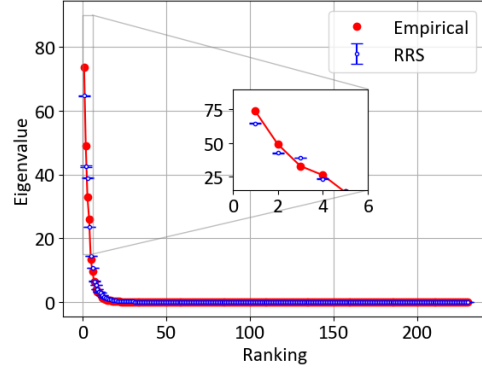

(b) 2021

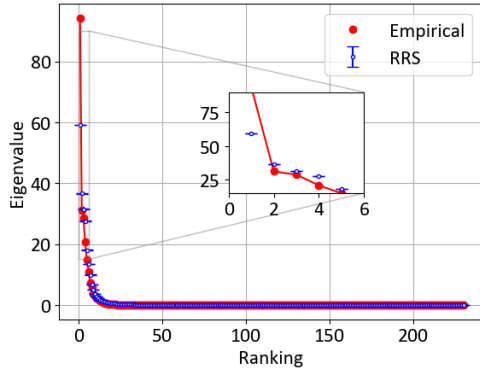

(c) 2022

SI Figure 5: Scree plots of CHPCA and the RRS. Each panel covers different years, i.e., 2020, 2021, and 2020. The error bars for the RRS indicate the 1% significance level, which is 2.33 times the standard error.

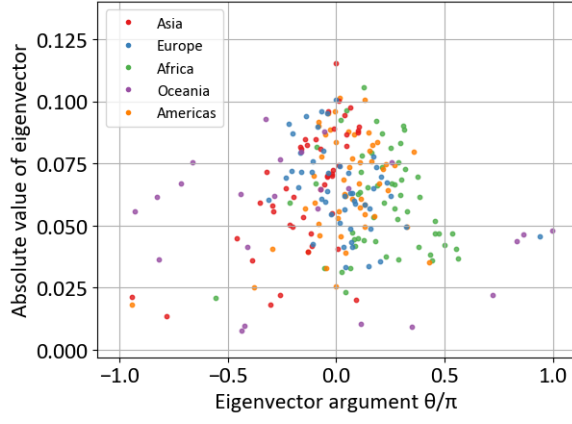

(a) Entire period

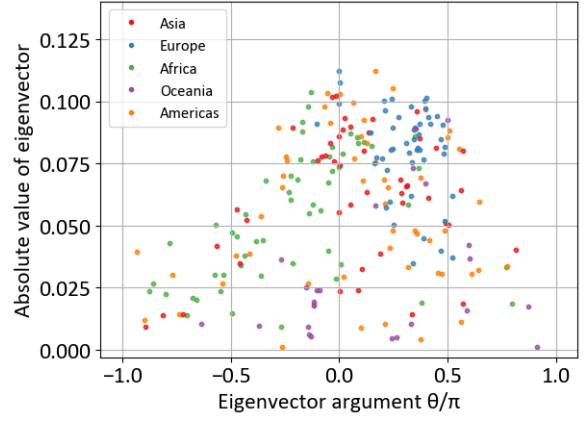

(b) 2020

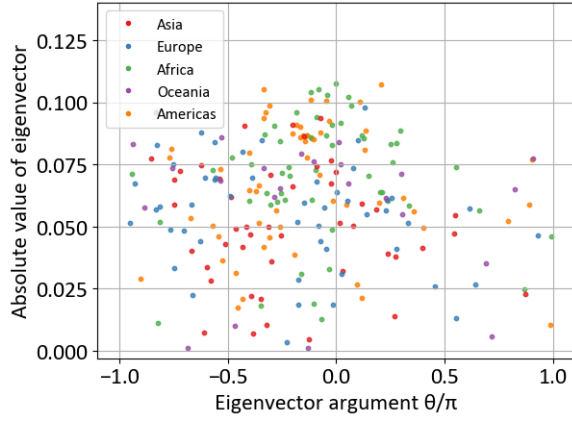

(c) 2021

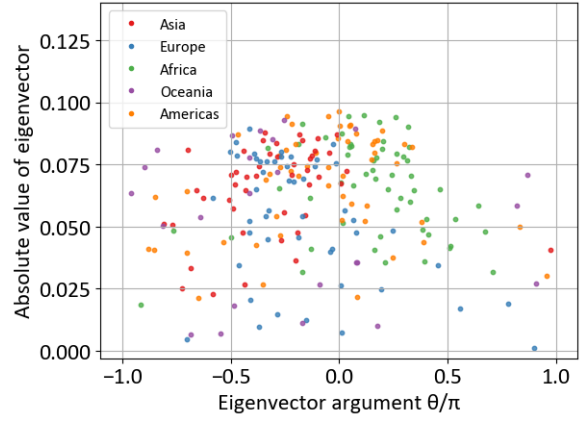

(d) 2022

SI Figure 6: Eigenvectors with the first eigenvalue coloured by region. The abscissa corresponds to the argument, and the ordinate corresponds to the absolute value (amplitude) of the eigenvector. Note that time progresses from right to left. Panels (a-d) show the entire period, 2020, 2021, and 2022, respectively.

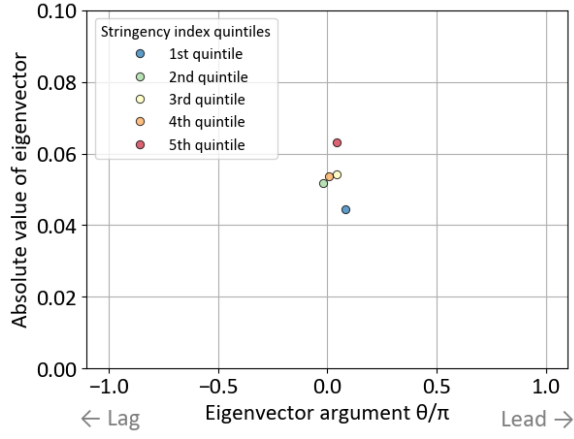

(a) Entire period

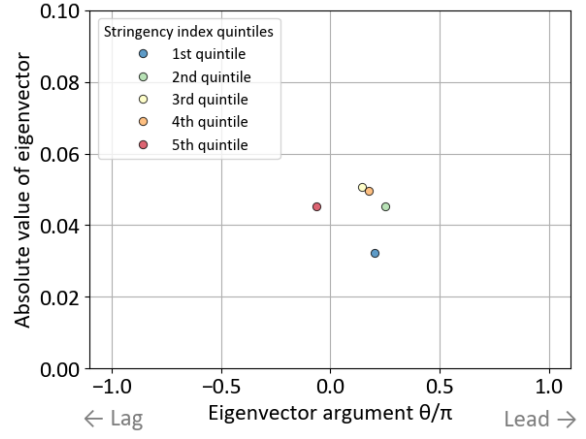

(b) 2020

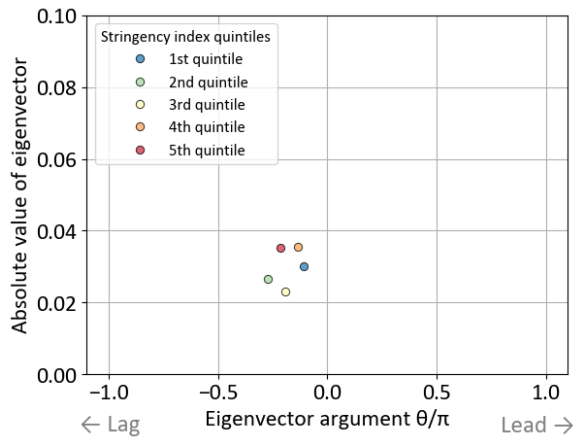

(c) 2021

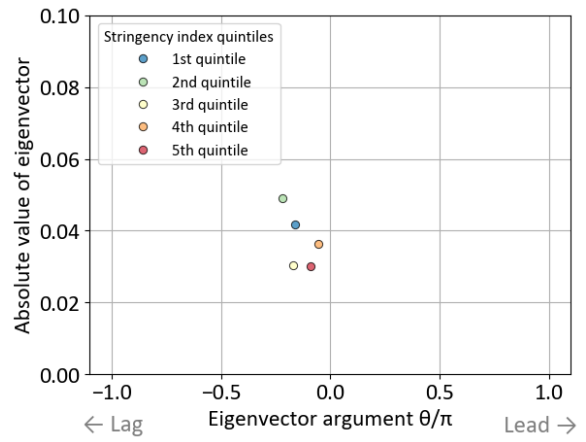

(d) 2022

SI Figure 7: Barycentres for five groups of each stringency index based on rank. The abscissa corresponds to the argument, and the ordinate corresponds to the absolute value (amplitude) of the eigenvector. Panels (a-d) represent the entire period, 2020, 2021, and 2022, respectively. Note that time progresses from right to left.

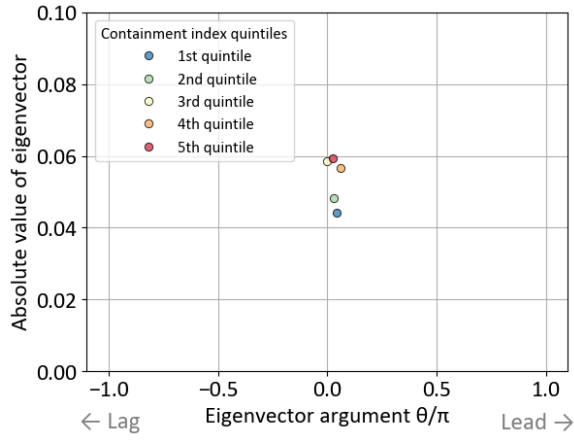

(a) Entire period

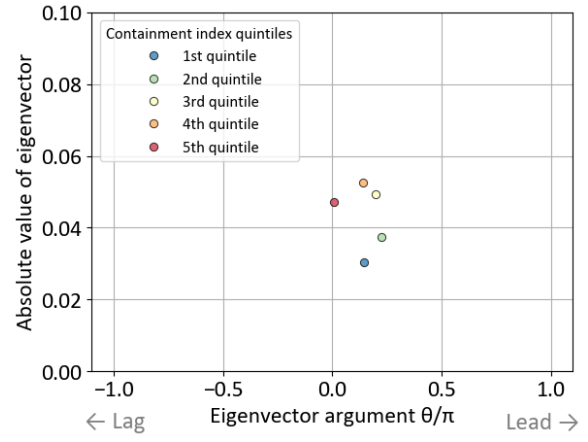

(b) 2020

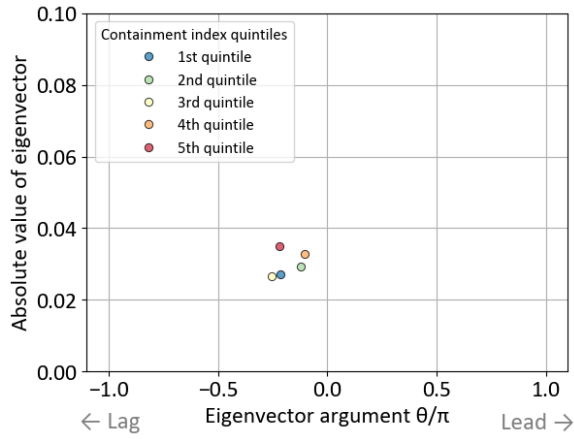

(c) 2021

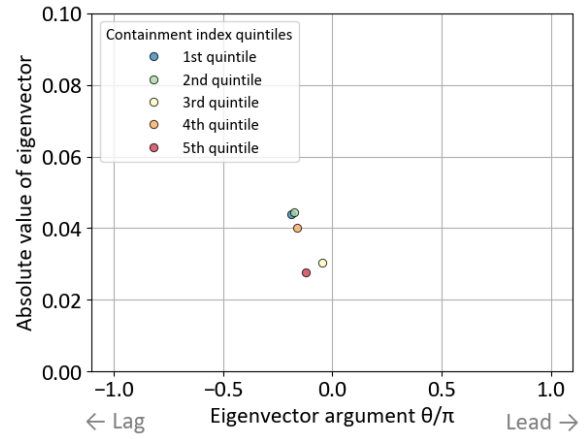

(d) 2022

SI Figure 8: Barycentres for five groups of the containment and health index group based on rank. The abscissa corresponds to the argument, and the ordinate corresponds to the absolute value (amplitude) of the eigenvector. Panels (a-d) represent the entire period, 2020, 2021, and 2022, respectively. Note that time progresses from right to left.



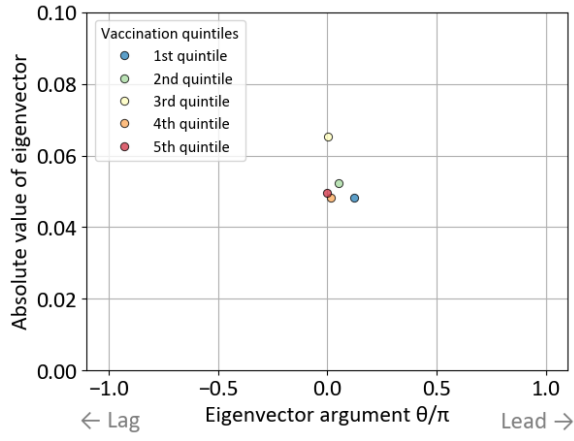

(a) Entire period

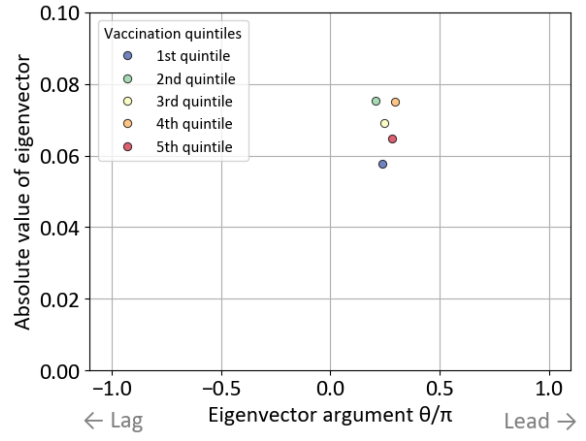

(b) 2020

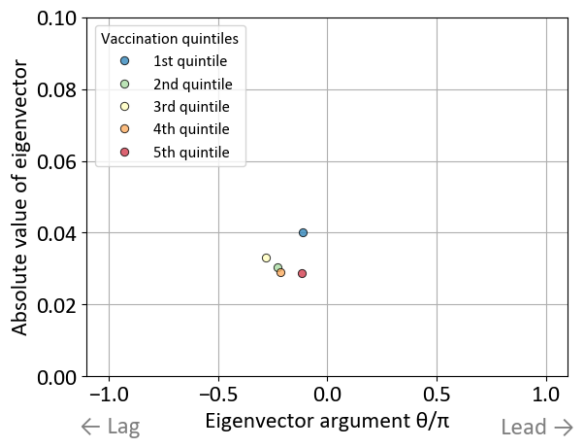

(c) 2021

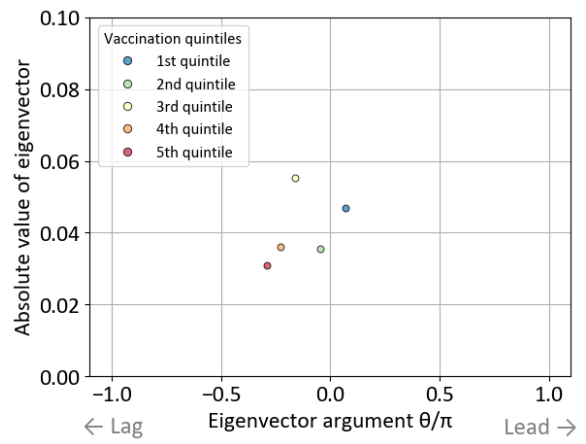

(d) 2022

SI Figure 9: Barycentres for five groups of the vaccination rate based on rank. The abscissa corresponds to the real axis, and the ordinate corresponds to the imaginary axis. Panels (a-d) represent the entire period, 2020, 2021, and 2022, respectively. Note that time progresses from right to left.

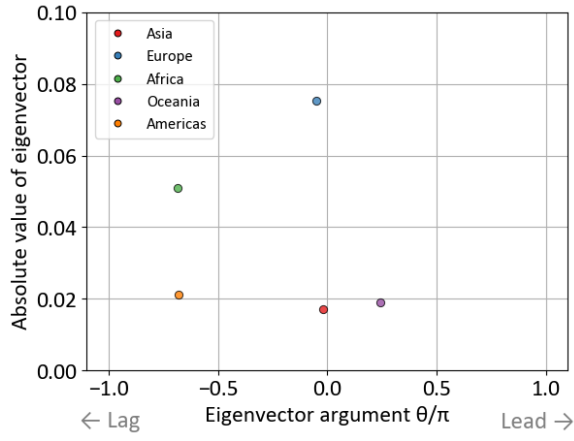

(a) Region

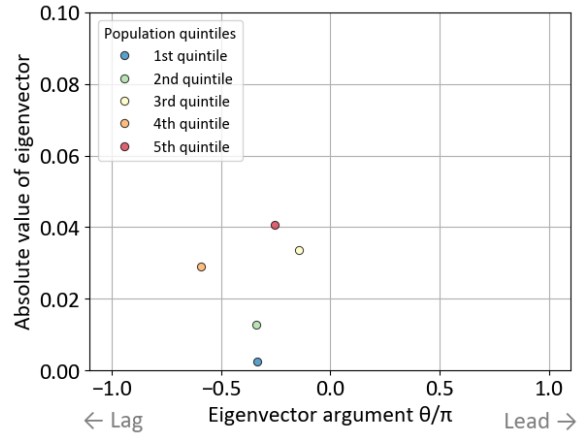

(b) Population

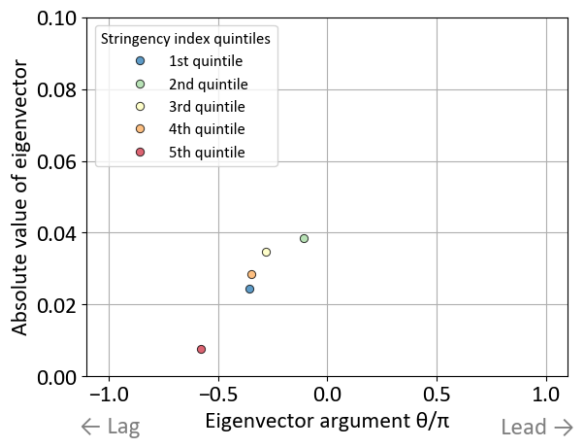

(c) Stringency Index

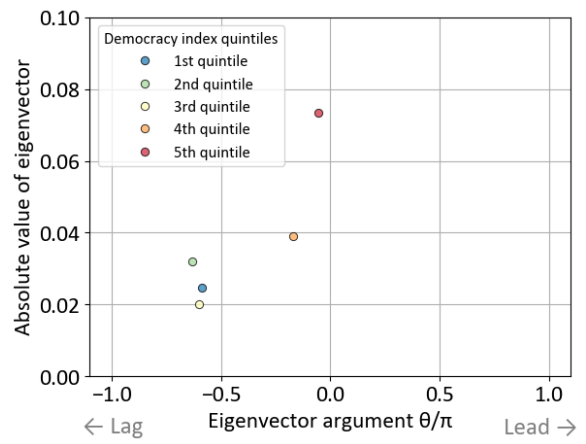

(d) Democracy Index

SI Figure 10: Barycentres of the second eigenvectors for data of the entire period. The panels are coloured by (a) region, (b) population, (c) stringency index [1], and (d) democracy index [2]. The abscissa corresponds to the argument, and the ordinate corresponds to the absolute value (amplitude) of the eigenvector. Note that time progresses from right to left.

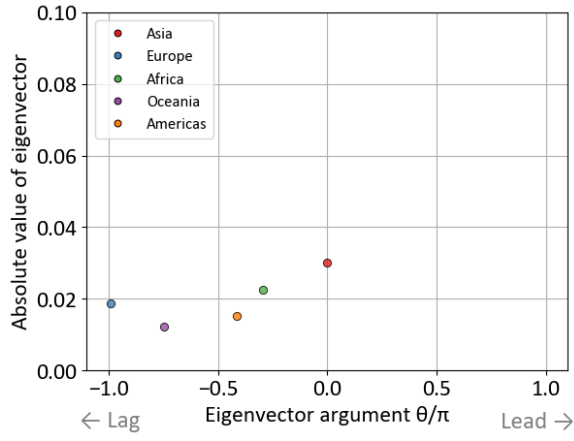

(a) Region

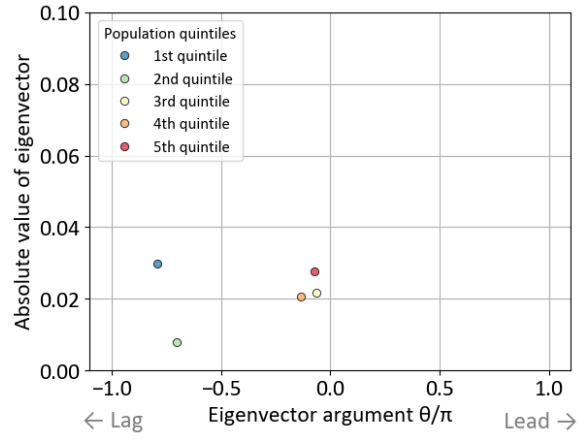

(b) Population

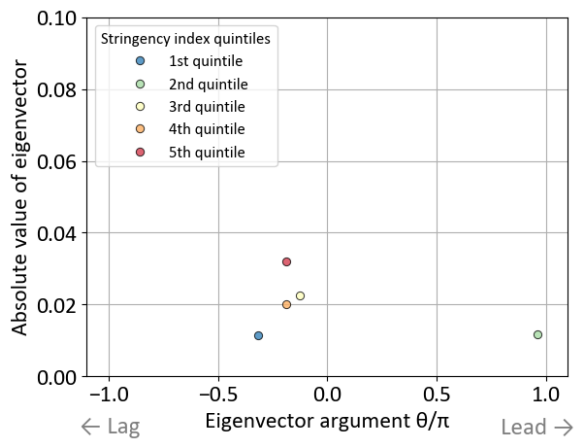

(c) Stringency Index

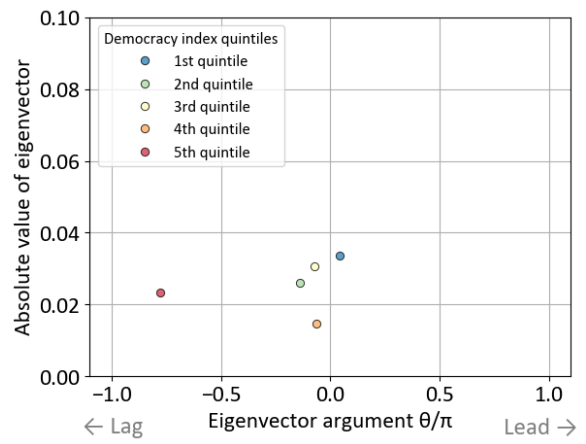

(d) Democracy Index

SI Figure 11: Barycentres of the third eigenvectors for the data of the entire period. The panels are coloured by (a) region, (b) population, (c) stringency index [1], and (d) democracy index [2]. The abscissa corresponds to the argument, and the ordinate corresponds to the absolute value (amplitude) of the eigenvector. Note that time progresses from right to left.

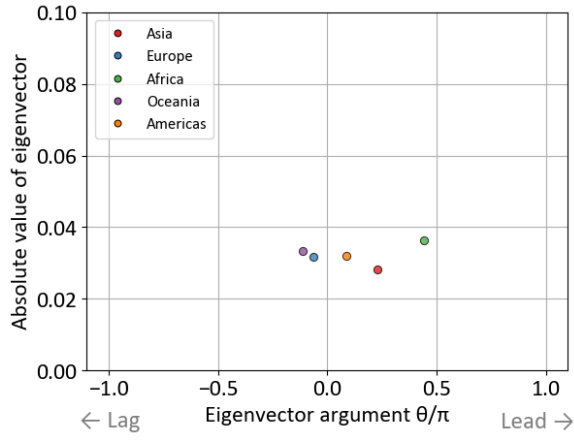

(a) Region

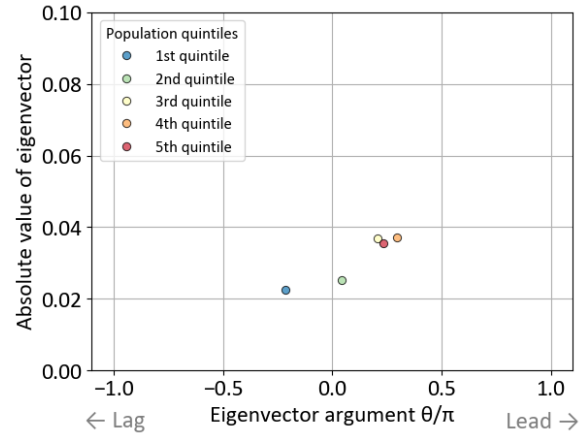

(b) Population

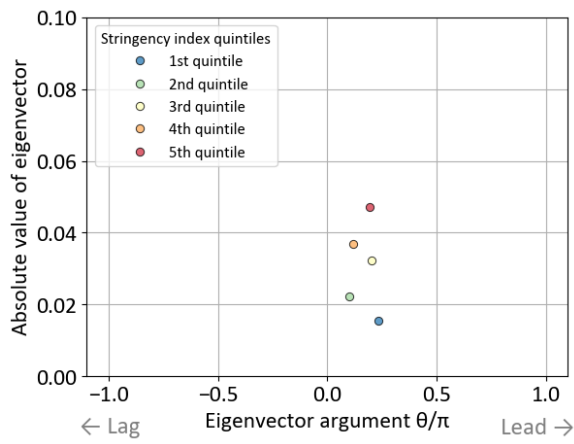

(c) Stringency Index

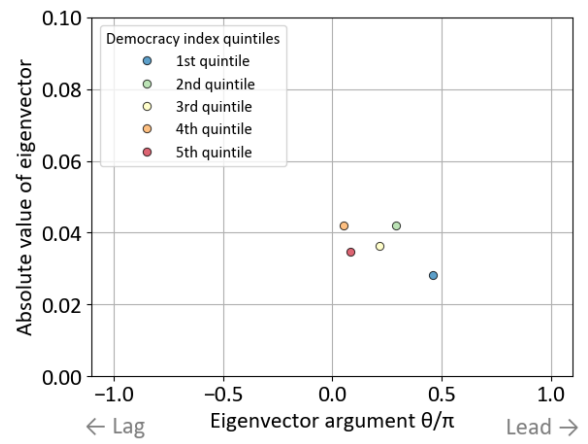

(d) Democracy Index

SI Figure 12: Barycentres of the second eigenvectors for the 2020 data. The panels are coloured by (a) region, (b) population, (c) stringency index [1], and (d) democracy index [2]. The abscissa corresponds to the argument, and the ordinate corresponds to the absolute value (amplitude) of the eigenvector. Note that time progresses from right to left.

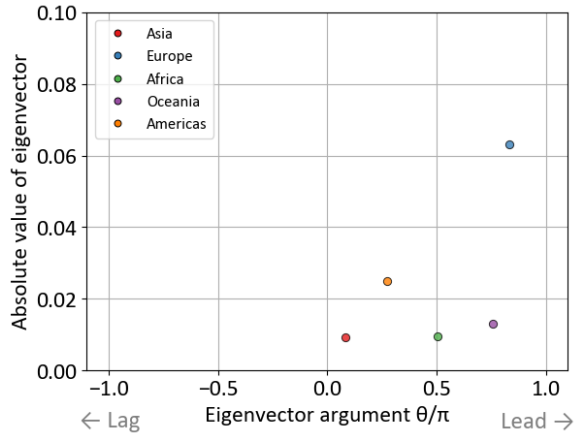

(a) Region

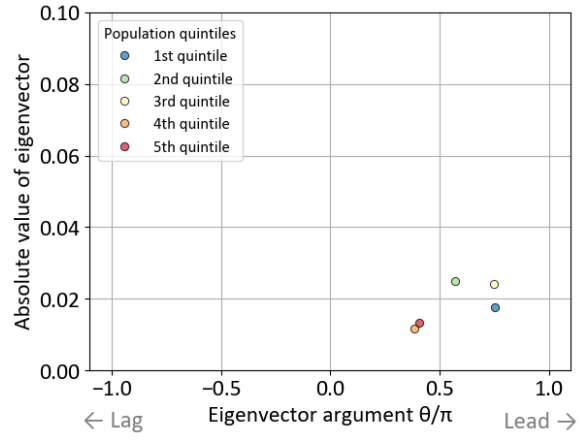

(b) Population

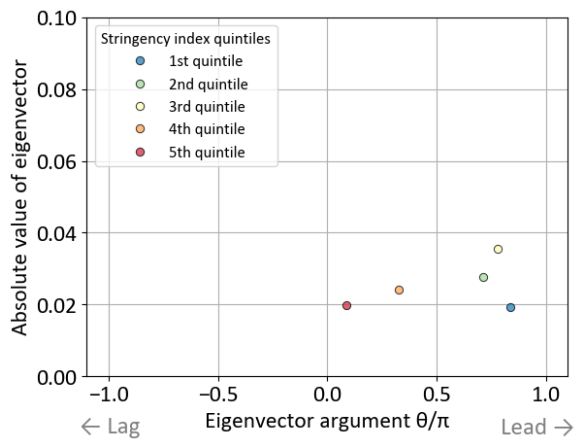

(c) Stringency Index

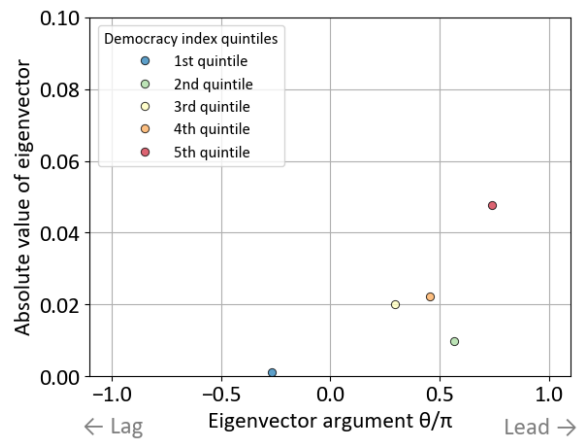

(d) Democracy Index

SI Figure 13: Barycentres of the second eigenvectors for the 2021 data. The panels are coloured by (a) region, (b) population, (c) stringency index [1], and (d) democracy index [2]. The abscissa corresponds to the argument, and the ordinate corresponds to the absolute value (amplitude) of the eigenvector. Note that time progresses from right to left.

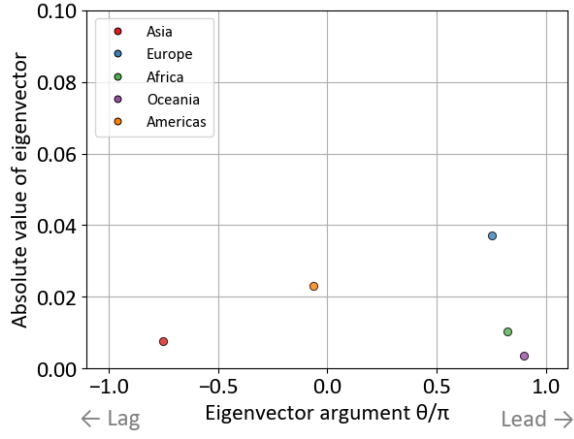

(a) Region

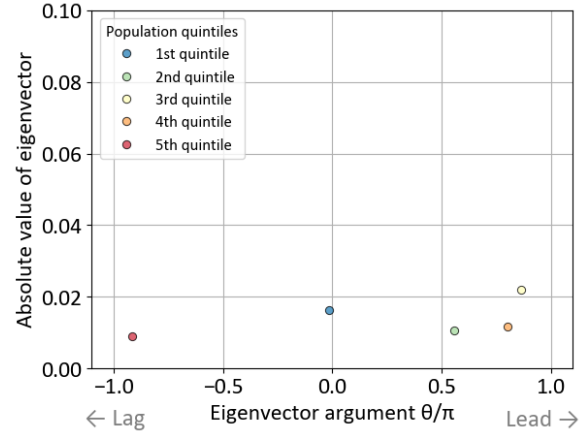

(b) Population

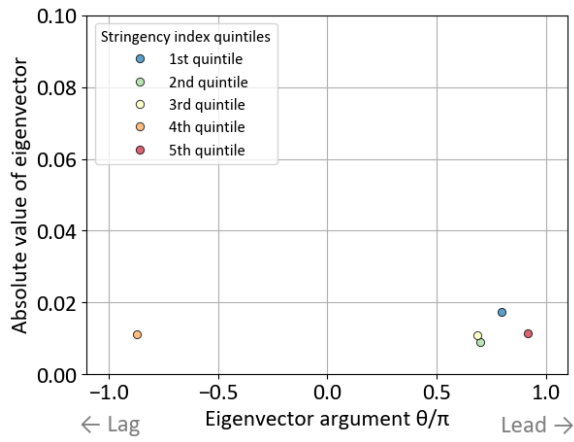

(c) Stringency Index

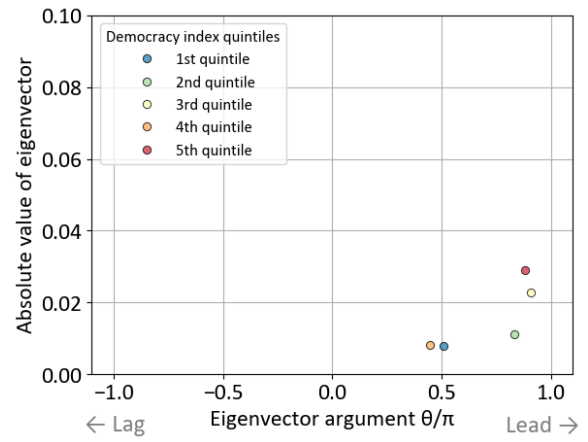

(d) Democracy Index

SI Figure 14: Barycentres of the second eigenvectors for the 2022 data. The panels are coloured by (a) region, (b) population, (c) stringency index [1], and (d) democracy index [2]. The abscissa corresponds to the argument, and the ordinate corresponds to the absolute value (amplitude) of the eigenvector. Note that time progresses from right to left.

## 2 Supplementary tables

The following list contains the tables referred to in the main text.

SI Table 1: Sample size of the auxiliary data.

SI Table 2: Mean distance from the barycentre. The mean distance is calculated for each group.

SI Table 1: Sample sizes of auxiliary data. The numbers indicates the number of observed countries in each dataset.

|                   | 2020 | 2021 | 2022 |
|-------------------|------|------|------|
| Population        | 265  | 265  | 265  |
| GDP               | 257  | 251  | 233  |
| Stringency Index  | 183  | 180  | 180  |
| Containment Index | 184  | 180  | 180  |
| Vaccinations Rate | 39   | 217  | 213  |
| Democracy Index   | 167  | 167  | 167  |



SI Table 2: Mean distance from the barycentre. The mean distance is calculated for each group. The columns indicate the position within the five groups, which are divided by rank.

|                               | Group    | Entire<br>Period | 2020  | 2021  | 2022  |
|-------------------------------|----------|------------------|-------|-------|-------|
| Regions                       | Asia     | 0.030            | 0.044 | 0.046 | 0.041 |
|                               | Europe   | 0.027            | 0.030 | 0.053 | 0.038 |
|                               | Africa   | 0.027            | 0.040 | 0.055 | 0.044 |
|                               | Oceania  | 0.046            | 0.031 | 0.057 | 0.053 |
|                               | Americas | 0.026            | 0.041 | 0.053 | 0.055 |
| Population                    | First    | 0.036            | 0.034 | 0.054 | 0.058 |
|                               | Second   | 0.032            | 0.042 | 0.053 | 0.049 |
|                               | Third    | 0.029            | 0.043 | 0.054 | 0.047 |
|                               | Fourth   | 0.028            | 0.044 | 0.055 | 0.047 |
|                               | Fifth    | 0.032            | 0.044 | 0.053 | 0.050 |
| GDP/Population                | First    | 0.025            | 0.035 | 0.056 | 0.040 |
|                               | Second   | 0.041            | 0.043 | 0.054 | 0.058 |
|                               | Third    | 0.032            | 0.042 | 0.048 | 0.046 |
|                               | Fourth   | 0.027            | 0.037 | 0.058 | 0.048 |
|                               | Fifth    | 0.022            | 0.030 | 0.046 | 0.043 |
| Stringency Index              | First    | 0.028            | 0.046 | 0.063 | 0.038 |
|                               | Second   | 0.032            | 0.038 | 0.050 | 0.046 |
|                               | Third    | 0.032            | 0.048 | 0.053 | 0.048 |
|                               | Fourth   | 0.031            | 0.044 | 0.054 | 0.055 |
|                               | Fifth    | 0.030            | 0.039 | 0.047 | 0.059 |
| Containment<br>& Health Index | First    | 0.033            | 0.044 | 0.062 | 0.044 |
|                               | Second   | 0.030            | 0.045 | 0.057 | 0.044 |
|                               | Third    | 0.031            | 0.044 | 0.043 | 0.051 |
|                               | Fourth   | 0.031            | 0.044 | 0.055 | 0.047 |
|                               | Fifth    | 0.030            | 0.041 | 0.050 | 0.061 |
| Vaccination Rate              | First    | 0.028            | 0.038 | 0.062 | 0.045 |
|                               | Second   | 0.034            | 0.032 | 0.056 | 0.050 |
|                               | Third    | 0.029            | 0.028 | 0.056 | 0.051 |
|                               | Fourth   | 0.031            | 0.022 | 0.050 | 0.054 |
|                               | Fifth    | 0.032            | 0.035 | 0.045 | 0.047 |
| Democracy Index               | First    | 0.032            | 0.041 | 0.059 | 0.050 |
|                               | Second   | 0.029            | 0.040 | 0.049 | 0.047 |
|                               | Third    | 0.035            | 0.041 | 0.059 | 0.048 |
|                               | Fourth   | 0.026            | 0.038 | 0.055 | 0.049 |
|                               | Fifth    | 0.023            | 0.025 | 0.045 | 0.040 |

## References

- [1] Our World in Data. Covid-19: Stringency index. <https://ourworldindata.org/covid-stringency-index> (accessed September 1, 2023), 2023.
- [2] Economist Intelligence. Democracy Index. <https://www.eiu.com/n/campaigns/democracy-index-2022/> (accessed: September 1, 2023), 2023.
